# Supplementary material
Source: PubMed Central journal article supplement (PMC3475387)
Supplement: mmc1.pdf [file mmc1.pdf]

# Molecular dynamics of class A $\beta$ -lactamases – Effects of substrate binding

## Supporting Material

Olivier Fisettes\*, Stéphane Gagné, Patrick Lagüe  
Département de biochimie, microbiologie et bio-informatique,  
Université Laval, Québec, Canada and PROTEO and IBIS

September 7, 2012

### Abstract

The effects of substrate binding on class A  $\beta$ -lactamase dynamics were studied using molecular dynamics simulations of two model enzymes; forty 100-ns trajectories of the free and substrate-bound forms of TEM-1 (with benzylpenicillin) and PSE-4 (with carbenicillin) were recorded (totalling 4.0  $\mu$ s). Substrates were parameterized with CGenFF. In both enzymes, the  $\Omega$  loop exhibits a marked flexibility increase upon substrate binding, supporting the hypothesis of substrate-gating. However, specific interactions that are formed or broken in the  $\Omega$  loop upon binding differ between the two enzymes: dynamics are conserved, but not specific interactions. Substrate binding also has a global structuring effect on TEM-1, but not on PSE-4. Changes in TEM-1's normal modes show long-range effects of substrate binding on enzyme dynamics. Hydrogen bonds observed in the active site are mostly preserved upon substrate binding, and new, transient interactions are also formed. Agreement between NMR relaxation parameters and our theoretical results highlights the dynamic duality of class A  $\beta$ -lactamases: enzymes that are highly structured on the ps-ns timescale, with important flexibility on the  $\mu$ s-ms timescale in regions such as the  $\Omega$  loop.

This supporting material document contains the detailed parameterization protocol for penicillin and carbenicillin  $\beta$ -lactam antibiotics, supporting results and figures for  $\beta$ -lactamase backbone dynamics, and a list of supporting movies (essential dynamics normal modes). Tabular data and force field files are available in plain text format upon request.

---

\*To whom correspondence should be addressed: Olivier Fisettes, Charles-Eugènes-Marchand building, office 4252, Université Laval, Québec (QC), Canada, G1V0A6; olivier.fisettes.1@ulaval.ca

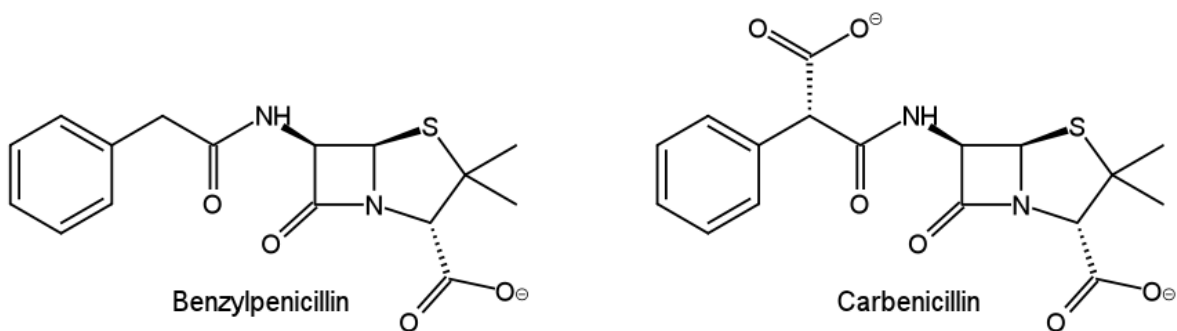

Figure S1: Structure of parameterization target compounds. Benzylpenicillin (BZP) is  $\beta$ -lactamase TEM-1's preferred substrate, while carbenicillin (CBC) is hydrolyzed efficiently by  $\beta$ -lactamase PSE-4.

## $\beta$ -lactam parameterization

### Summary

Benzylpenicillin and carbenicillin (Figure S1) [1, 2] were parameterized within the context of the CGenFF forcefield [3], version 2b5. The four-member ring was the first and principal fragment considered. The substituted four member ring was then fused to the five-atom cycle to form the basic antibiotics scaffold. The C-S bond at the rings junction needed parameterization since it is currently missing from CGenFF. Afterwards, the other substituents were added to create benzylpenicillin. Finally, an additional carboxyl was added to form carbenicillin. At all steps, the suggested CGenFF parameterization protocol and philosophy were followed to obtain transferable parameters that could be used to construct a wide variety of penicillin-like  $\beta$ -lactams.

### $\beta$ -Lactam ring

Since  $\beta$ -lactam antibiotics are mimetic dipeptides, a first attempt was made at parameterizing a minimal  $\beta$ -lactam by analogy with existing amino acid parameters, chiefly proline (due to the disubstituted amide in the lactam cycle). However, MM geometry minimization showed that the cycle conformation differed from that suggested by quantum mechanics calculations (Figure S2): the cycle has a pronounced pucker, whilst the QM-geometry is nearly flat. All MM calculations in this work were carried out with CHARMM c35b1 [4]. All QM calculations in this work were carried out with Gaussian 03 [5].

MM-geometry being inadequate, the  $\beta$ -lactam ring was reparameterized. To avoid modifying existing CGenFF parameters, and considering that the chemical environment in a four-member ring is substantially different from anything else in CGenFF, we introduced new atom types for the four-member cycle. Initial parameters and partial charges were guessed by analogy with amino acids. Atom types are:

- CG315: Aliphatic C for CH in  $\beta$ -lactam ring, analog to CG311
- NG2S4: N,N-Disubstituted amide N in  $\beta$ -lactam ring, analog to NG2S0
- CG2O8: Amide carbonyl C in  $\beta$ -lactam ring, analog to CG2O1

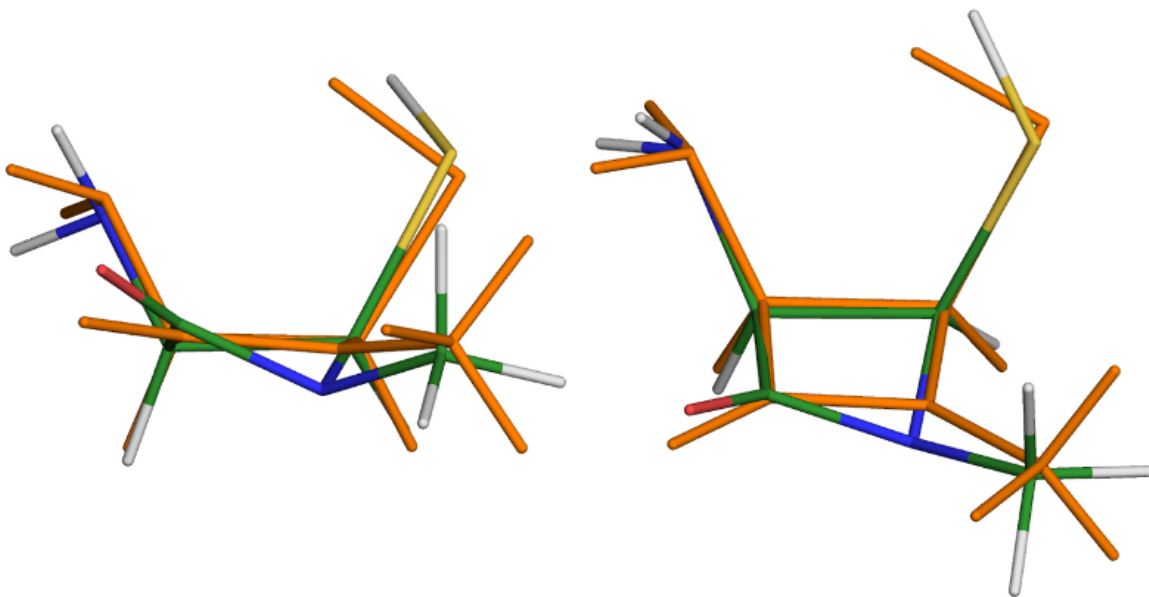

Figure S2: Comparison of QM and MM geometry optimization (two different orientations) for a minimal substituted  $\beta$ -lactam. QM-optimized structure in orange; MD-optimized structure is CPK-colored, with green carbons.

The previously shown  $\beta$ -lactam ring (Figure S2) was used for parameter optimization; atom numbering is shown in Figure S3.

## Non-bonded terms

The non-bonded terms taken from existing atom types (CG311, NG2S0, CG2O1) were not reoptimized, in keeping with the recommended CGenFF strategy.

## Geometry

Atom equilibrium distances, Urey-Bradley distances and angles involving the new atom types were set according to the QM-optimized geometry at the MP2 level of theory in the 6-31G(d) ensemble.

## Partial charges

Merz-Kollman charges were computed at the MP2 level and used as initial guesses for partial atomic charges in the  $\beta$ -lactam ring, except for aliphatic protons, whose charge was set to 0.09 and not optimized. Substituent (CH<sub>3</sub>, SH and NH<sub>2</sub>) charges were set by analogy with existing CGenFF compounds and were not optimized. The equilibrium distances and energies of four water molecules were computed at the HF level (Figure S4).

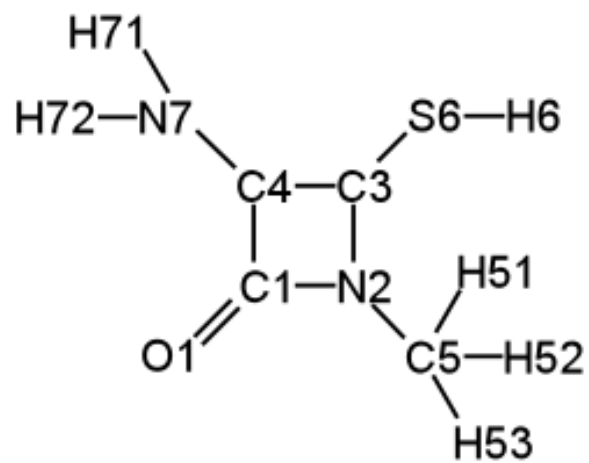

Figure S3: Substituted  $\beta$ -lactam used as parameterization starting point. Atom numbering is shown.

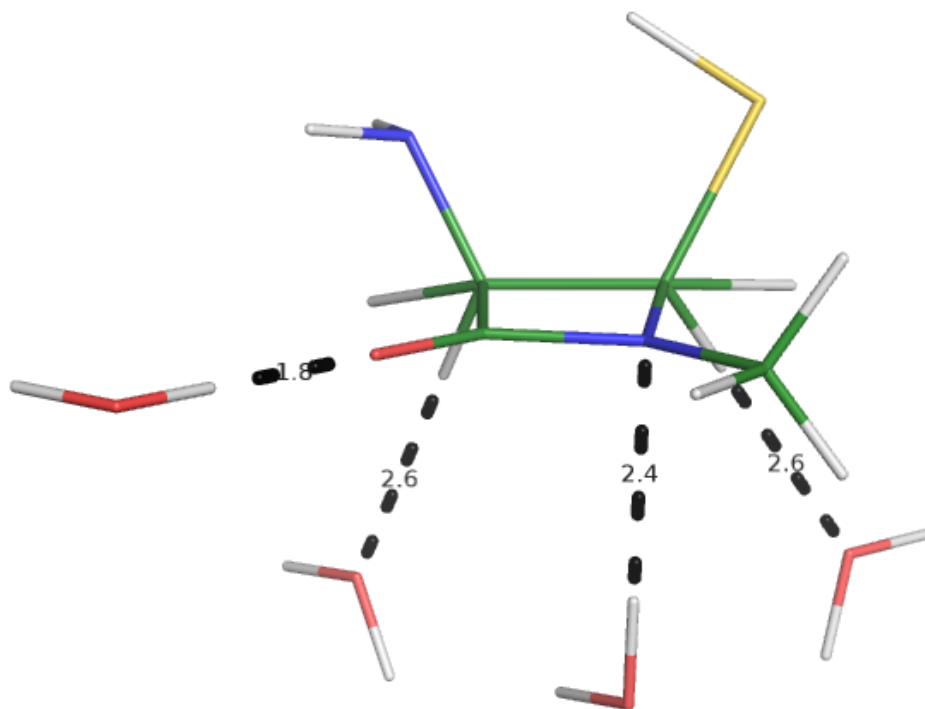

Figure S4: Solvation distances and orientations for  $\beta$ -lactam parameterization.

Table S1: Partial atomic charges on minimal substituted  $\beta$ -lactam

| Atom | Type   | Charge<br>e | $\Delta E$ QM<br>kcal/mol | $\Delta E$ MM<br>kcal/mol | $\Delta\Delta E$<br>kcal/mol | d QM<br>Å | d MM<br>Å | $\Delta d$<br>Å |
|------|--------|-------------|---------------------------|---------------------------|------------------------------|-----------|-----------|-----------------|
| C1   | CG2O8  | 0.475       |                           |                           |                              |           |           |                 |
| O1   | OG2D1  | -0.475      | -5.51                     | -5.52                     | 0.01                         | 2.06      | 1.79      | 0.27            |
| N2   | NG2S4  | -0.410      | 0.21                      | 0.29                      | -0.08                        | 2.61      | 2.36      | 0.25            |
| C3   | CG315  | 0.195       |                           |                           |                              |           |           |                 |
| H3   | HGA1   | 0.090       | -2.52                     | -2.57                     | 0.04                         | 2.51      | 2.60      | -0.09           |
| C4   | CG315  | 0.175       |                           |                           |                              |           |           |                 |
| H4   | HGA1   | 0.090       | -2.56                     | -2.63                     | 0.07                         | 2.54      | 2.60      | -0.06           |
| C5   | CG331  | -0.060      |                           |                           |                              |           |           |                 |
| H51  | HGA3   | 0.090       |                           |                           |                              |           |           |                 |
| H52  | HGA3   | 0.090       |                           |                           |                              |           |           |                 |
| S6   | SG311  | -0.230      |                           |                           |                              |           |           |                 |
| H6   | HGP3   | 0.160       |                           |                           |                              |           |           |                 |
| N7   | NG321  | -0.960      |                           |                           |                              |           |           |                 |
| H71  | HGPAM2 | 0.340       |                           |                           |                              |           |           |                 |
| H72  | HGPAM2 | 0.340       |                           |                           |                              |           |           |                 |

The same solvation was performed using the MM forcefield. Charges were adjusted manually to reproduce QM distances and interaction energies. Final partial charges are given in Table S1.

## Bonded terms

Bond, angle and improper angle force constants involving new atom types were optimized by minimizing divergence between the QM and MM vibrational spectra. QM frequencies were computed at the MP2 level and compared to CHARMM-generated values (scaled by 94 %). The average difference between the two spectra was 8.5 % prior to optimization.

An automated optimization algorithm was used, which assumes a global minimum and slowly modifies all force constants to move towards that minimum. Different starting points and algorithms were used, and all converged to the same point. After optimization, vibrational frequencies differed on average by 4.8 %. Optimized parameters are given in Tables S2 (bonds) and S3 (angles). Angles that contain only one new atom in a non central position were not reoptimized (Table S4). Improper angles were optimized (Table S5).

Optimizing dihedral angle and Urey-Bradley constants through vibrational spectra yielded no measurable improvement compared to the values taken from CGenFF by analogy, so the initial values were kept unchanged. Since the  $\beta$ -lactam ring is very rigid, potential energy scans for dihedral constants (using *fit\_dihedral* [6], for instance) were deemed unnecessary. Dihedral and Urey-Bradley parameters are given in Tables S6 and S7, respectively.

## Iteration

Partial charges were checked again since modifying the bonded terms could have an impact on solvation energies. However, no significant change was observed. A second round of optimization was therefore not necessary. (Solvation energies reported above are the final results after bonded

Table S2: Optimized bond constants for minimal substituted  $\beta$ -lactam

| Bond  |       | k        | d       |
|-------|-------|----------|---------|
|       |       | kcal/mol | Å       |
| CG2O8 | OG2D1 | 725.0    | 1.22188 |
| CG2O8 | NG2S4 | 267.0    | 1.36713 |
| CG2O8 | CG315 | 297.5    | 1.53754 |
| CG315 | NG2S4 | 298.0    | 1.46504 |
| CG315 | HGA1  | 341.0    | 1.09676 |
| CG315 | CG315 | 270.0    | 1.57285 |
| NG2S4 | CG331 | 405.5    | 1.44255 |
| CG315 | SG311 | 283.5    | 1.80608 |
| CG315 | NG321 | 342.5    | 1.44688 |

Table S3: Optimized angle constants for minimal substituted  $\beta$ -lactam

| Angle |       |       | k        | $\theta$ |
|-------|-------|-------|----------|----------|
|       |       |       | kcal/mol | °        |
| CG2O8 | NG2S4 | CG315 | 10.0     | 95.724   |
| CG315 | CG315 | NG2S4 | 52.0     | 87.034   |
| CG2O8 | CG315 | CG315 | 10.0     | 84.983   |
| CG315 | CG2O8 | NG2S4 | 67.0     | 92.027   |
| NG2S4 | CG2O8 | OG2D1 | 77.0     | 133.609  |
| CG315 | CG2O8 | OG2D1 | 15.0     | 134.322  |
| CG2O8 | NG2S4 | CG331 | 55.5     | 131.522  |
| CG315 | NG2S4 | CG331 | 139.0    | 131.828  |
| SG311 | CG315 | NG2S4 | 72.0     | 117.164  |
| CG315 | CG315 | SG311 | 89.4     | 117.004  |
| CG2O8 | CG315 | NG321 | 14.5     | 111.267  |
| CG315 | CG315 | NG321 | 79.2     | 116.893  |
| NG2S4 | CG315 | HGA1  | 45.5     | 112.900  |
| CG315 | CG315 | HGA1  | 37.0     | 113.254  |
| CG2O8 | CG315 | HGA1  | 40.0     | 113.556  |
| SG311 | CG315 | HGA1  | 31.0     | 107.086  |
| NG321 | CG315 | HGA1  | 13.0     | 115.059  |

Table S4: Angle constants not subjected to optimization for minimal substituted  $\beta$ -lactam

| Angle |       |        | k        | $\theta$ |
|-------|-------|--------|----------|----------|
|       |       |        | kcal/mol | °        |
| NG2S4 | CG331 | HGA3   | 48.0     | 112.000  |
| CG315 | SG311 | HGP3   | 38.8     | 95.000   |
| CG315 | NG321 | HGPAM2 | 41.0     | 112.100  |

Table S5: Improper angle constants for minimal substituted  $\beta$ -lactam

| Improper angle |       |       |       | k        | m | p    |
|----------------|-------|-------|-------|----------|---|------|
|                |       |       |       | kcal/mol | - | °    |
| CG2O8          | X     | X     | OG2D1 | 161.5    | 0 | 0.00 |
| NG2S4          | CG2O8 | CG315 | CG331 | 0.0      | 0 | 0.00 |

Table S6: Dihedral angle constants for minimal substituted  $\beta$ -lactam

| Dihedral angle |       |       |        | k        | m | p          |
|----------------|-------|-------|--------|----------|---|------------|
|                |       |       |        | kcal/mol | - | $^{\circ}$ |
| HGA1           | CG315 | NG2S4 | CG2O8  | 0.8000   | 3 | 0.00       |
| CG315          | CG315 | NG2S4 | CG2O8  | 0.8000   | 3 | 0.00       |
| SG311          | CG315 | NG2S4 | CG2O8  | 0.8000   | 3 | 0.00       |
| HGA3           | CG331 | NG2S4 | CG2O8  | 0.0000   | 3 | 0.00       |
| CG2O8          | CG315 | CG315 | NG2S4  | 0.2000   | 3 | 0.00       |
| CG2O8          | CG315 | CG315 | HGA1   | 0.2000   | 3 | 0.00       |
| CG2O8          | CG315 | CG315 | SG311  | 0.2000   | 3 | 0.00       |
| CG2O8          | CG315 | NG321 | HGPAM2 | 0.3000   | 3 | 180.00     |
| OG2D1          | CG2O8 | NG2S4 | CG315  | 2.7500   | 2 | 180.00     |
| OG2D1          | CG2O8 | NG2S4 | CG315  | 0.3000   | 4 | 0.00       |
| OG2D1          | CG2O8 | NG2S4 | CG331  | 2.7500   | 2 | 180.00     |
| OG2D1          | CG2O8 | NG2S4 | CG331  | 0.3000   | 4 | 0.00       |
| OG2D1          | CG2O8 | CG315 | CG315  | 0.4000   | 1 | 180.00     |
| OG2D1          | CG2O8 | CG315 | CG315  | 0.6000   | 2 | 0.00       |
| OG2D1          | CG2O8 | CG315 | HGA1   | 0.4000   | 1 | 0.00       |
| OG2D1          | CG2O8 | CG315 | HGA1   | 0.6000   | 2 | 0.00       |
| OG2D1          | CG2O8 | CG315 | NG321  | 0.0000   | 1 | 0.00       |
| NG2S4          | CG2O8 | CG315 | CG315  | 0.4000   | 1 | 0.00       |
| NG2S4          | CG2O8 | CG315 | CG315  | 0.6000   | 2 | 0.00       |
| NG2S4          | CG2O8 | CG315 | HGA1   | 0.4000   | 1 | 180.00     |
| NG2S4          | CG2O8 | CG315 | HGA1   | 0.6000   | 2 | 0.00       |
| NG2S4          | CG2O8 | CG315 | NG321  | 0.3000   | 1 | 0.00       |
| NG2S4          | CG2O8 | CG315 | NG321  | -0.3000  | 4 | 0.00       |
| NG2S4          | CG315 | CG315 | HGA1   | 0.2000   | 3 | 0.00       |
| NG2S4          | CG315 | CG315 | NG321  | 0.3000   | 3 | 180.00     |
| NG2S4          | CG315 | SG311 | HGP3   | 0.2000   | 3 | 0.00       |
| CG315          | CG2O8 | NG2S4 | CG315  | 2.7500   | 2 | 180.00     |
| CG315          | CG2O8 | NG2S4 | CG315  | 0.3000   | 4 | 0.00       |
| CG315          | NG2S4 | CG331 | HGA3   | 0.0000   | 3 | 0.00       |
| CG315          | CG315 | NG321 | HGPAM2 | 0.3000   | 3 | 180.00     |
| HGA1           | CG315 | NG2S4 | CG331  | 0.1000   | 3 | 0.00       |
| HGA1           | CG315 | CG315 | HGA1   | 0.1950   | 3 | 0.00       |
| NG321          | CG315 | CG315 | HGA1   | 0.1950   | 3 | 0.00       |
| HGA1           | CG315 | SG311 | HGP3   | 0.1950   | 3 | 0.00       |
| CG315          | CG2O8 | NG2S4 | CG331  | 2.7500   | 2 | 180.00     |
| CG315          | CG2O8 | NG2S4 | CG331  | 0.3000   | 4 | 0.00       |
| CG315          | CG315 | NG2S4 | CG331  | 0.1000   | 3 | 0.00       |
| CG315          | CG315 | SG311 | HGP3   | 0.1950   | 3 | 0.00       |
| SG311          | CG315 | CG315 | HGA1   | 0.1950   | 3 | 0.00       |
| HGA1           | CG315 | NG321 | HGPAM2 | 0.0100   | 3 | 0.00       |
| SG311          | CG315 | NG2S4 | CG331  | 0.1000   | 3 | 0.00       |
| SG311          | CG315 | CG315 | NG321  | 0.3000   | 3 | 180.00     |

Table S7: Urey-Bradley constants for minimal substituted  $\beta$ -lactam

| Urey-Bradley |       |      | k        | d      |
|--------------|-------|------|----------|--------|
|              |       |      | kcal/mol | Å      |
| CG315        | CG315 | HGA1 | 22.53    | 2.2445 |
| NG321        | CG315 | HGA1 | 50.00    | 2.1554 |

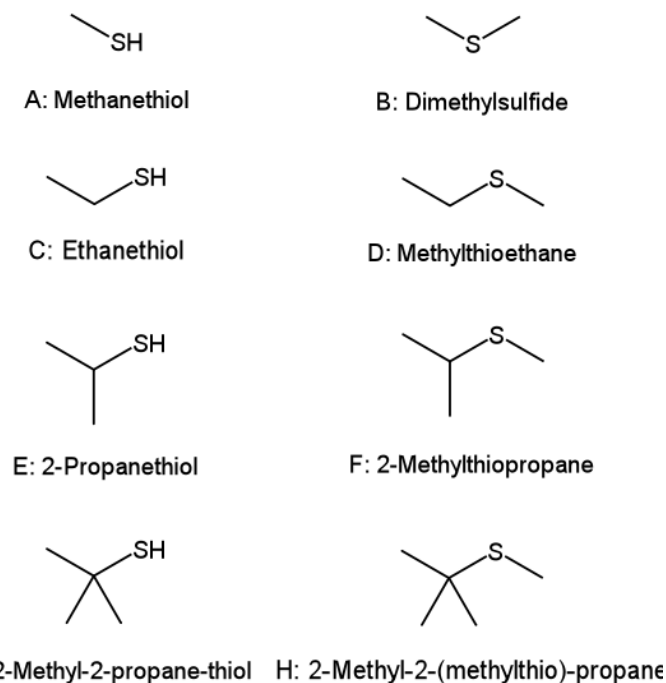

Figure S5: Sulfur-containing compounds used for SG311–GC301 bond parameterization.

parameters optimization.)

## Sulfur-carbon bonds

Since the SG311–CG301 bond is not parameterized in CGenFF but is required to build the penicillin scaffold, it became the second parameterization step. Eight molecules were used to optimise carbon-sulfur bond and angle parameters (Figure S5).

Compounds A and B were used as controls for the CG331–SG311 bond already present in CGenFF. Compounds C and D were used as controls for the CG321–SG311 bond already present in CGenFF. Compounds E and F were used to parameterize the CG311–SG311 bond. Compounds G and H were used to parameterise the CG301–SG311 bond.

Partial charges for all atoms in these compounds were assigned using the systematic values seen in CGenFF: 0.09 for hydrogens, but 0.16 for sulfur-linked hydrogens. Sulfur atoms were given a charge of -0.23 if linked to only one carbon (compounds A, C, E, G) or -0.10 if linked to two carbons (compounds B, D, F and H). Carbons were given charges of -0.27, -0.18, -0.09 or 0.00 when linked to 3, 2, 1 or 0 hydrogen, respectively. Carbon charges were adjusted by +0.07 when linked to an -SH function, and



Table S8: Optimized bond constants for sulfur-containing compounds

| Bond  |       | k        | d      |
|-------|-------|----------|--------|
|       |       | kcal/mol | Å      |
| CG301 | SG311 | 162.5    | 1.8387 |
| CG311 | SG311 | 197.0    | 1.8271 |

Table S9: Optimized angle constants for sulfur-containing compounds

| Angle |       |       | k        | $\theta$ |
|-------|-------|-------|----------|----------|
|       |       |       | kcal/mol | °        |
| CG331 | CG301 | SG311 | 56.5     | 108.74   |
| CG301 | SG311 | CG331 | 56.0     | 102.98   |
| CG301 | SG311 | HGP3  | 54.5     | 96.22    |
| CG331 | CG311 | SG311 | 51.5     | 109.77   |
| SG311 | CG311 | HGA1  | 40.0     | 107.37   |
| CG311 | SG311 | HGP3  | 51.0     | 96.59    |
| CG311 | SG311 | CG331 | 93.5     | 100.48   |

by +0.05 when linked to an -S- function.

QM-geometry at MP2/6-31G(d) were used to determine equilibrium distances and angles. Values measured in compounds E and F were averaged to describe the CG311-SG311 bond and related angles. Values from compounds G and H were averaged to describe CG301-SG311.

Vibrational spectra were used to adjust bond and angle force constants as described previously. Final values are shown in Tables S8 (bonds) and S9 (angles). Values for existing parameters (controls, data not shown) were similar to CGenFF values (within 5 %). Dihedral angle optimization yielded no improvement over the values taken by analogy from existing CGenFF parameters (Table S10).

## Penicillin scaffold

The  $\beta$ -lactam ring was then fused to the five-member cycle, and substituents added to form penicillin (Figure S6). Charges on removed hydrogen atoms were summed into the adjacent heavy atom. Charges on substituents were set according to the systematic values from existing CGenFF compounds. Missing dihedral angles were filled in by simple analogies with existing CGenFF parameters.

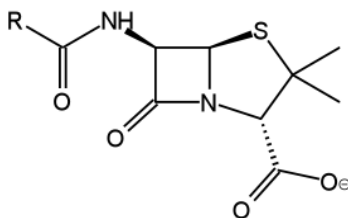Figure S6: Penicillin scaffold allowing the generation of a variety of  $\beta$ -lactam antibiotics.

Table S10: Dihedral angle constants for sulfur-containing compounds

| Dihedral angle |       |       |       | k        | m | p    |
|----------------|-------|-------|-------|----------|---|------|
|                |       |       |       | kcal/mol | - | °    |
| CG331          | CG311 | SG311 | HGP3  | 1.3300   | 1 | 0.00 |
| CG331          | CG311 | SG311 | HPG3  | 0.1800   | 2 | 0.00 |
| CG331          | CG311 | SG311 | HGP3  | 0.3200   | 3 | 0.00 |
| SG311          | CG311 | CG331 | HGA3  | 0.1600   | 3 | 0.00 |
| HGA1           | CG311 | SG311 | HGP3  | 0.0000   | 3 | 0.00 |
| CG331          | CG311 | SG311 | CG331 | 0.4000   | 1 | 0.00 |
| CG331          | CG311 | SG311 | CG331 | 0.4900   | 3 | 0.00 |
| HGA3           | CG331 | SG311 | CG311 | 0.2840   | 3 | 0.00 |
| HGA1           | CG311 | SG311 | CG331 | 0.2840   | 3 | 0.00 |
| CG331          | CG301 | SG311 | CG331 | 0.4000   | 1 | 0.00 |
| CG331          | CG301 | SG311 | CG331 | 0.4900   | 3 | 0.00 |
| SG311          | CG301 | CG331 | HGA3  | 0.1600   | 3 | 0.00 |
| HGA3           | CG331 | SG311 | CG301 | 0.2840   | 3 | 0.00 |
| CG331          | CG301 | SG311 | HGP3  | 1.1300   | 1 | 0.00 |
| CG331          | CG301 | SG311 | HGP3  | 0.1400   | 2 | 0.00 |
| CG331          | CG301 | SG311 | HGP3  | 0.2400   | 3 | 0.00 |

Table S11: Bond lengths in final  $\beta$ -lactam compounds

| Bond |     | Benzylpenicillin |      |          | Carbenicillin |      |          |
|------|-----|------------------|------|----------|---------------|------|----------|
|      |     | QM               | MM   | $\Delta$ | QM            | MM   | $\Delta$ |
|      |     | Å                | Å    | Å        | Å             | Å    | Å        |
| C1   | N2  | 1.36             | 1.38 | 0.02     | 1.39          | 1.39 | 0.00     |
| N2   | C3  | 1.44             | 1.44 | 0.00     | 1.46          | 1.45 | -0.01    |
| C3   | C4  | 1.55             | 1.57 | 0.02     | 1.57          | 1.57 | 0.00     |
| C1   | C4  | 1.54             | 1.55 | 0.01     | 1.55          | 1.55 | 0.00     |
| C1   | O1  | 1.19             | 1.22 | 0.03     | 1.22          | 1.22 | 0.00     |
| N2   | C5  | 1.45             | 1.45 | 0.00     | 1.46          | 1.45 | -0.01    |
| C3   | S7  | 1.83             | 1.81 | -0.02    | 1.84          | 1.81 | -0.03    |
| C4   | N11 | 1.43             | 1.46 | 0.03     | 1.43          | 1.47 | 0.04     |

## Final compounds

Toluene was then fused to penicillin to generate the classic benzylpenicillin antibiotics. Finally, a carboxyl function was fused to benzylpenicillin to generate carbenicillin. Charges on removed hydrogen atoms were summed into the adjacent heavy atom and charges on substituents were set according to the systematic values from existing CGenFF compounds. Missing dihedral angles were filled in by simple analogies with existing CGenFF parameters. Optimized geometry and dipole moment for the two compounds were compared to QM-derived values and shown to be similar (Figure S7 and Tables S11, S12 and S13).

## Usage instructions

The atom nomenclature for benzylpenicillin (BZP) and carbenicillin (CBC) are given in Figure S8.

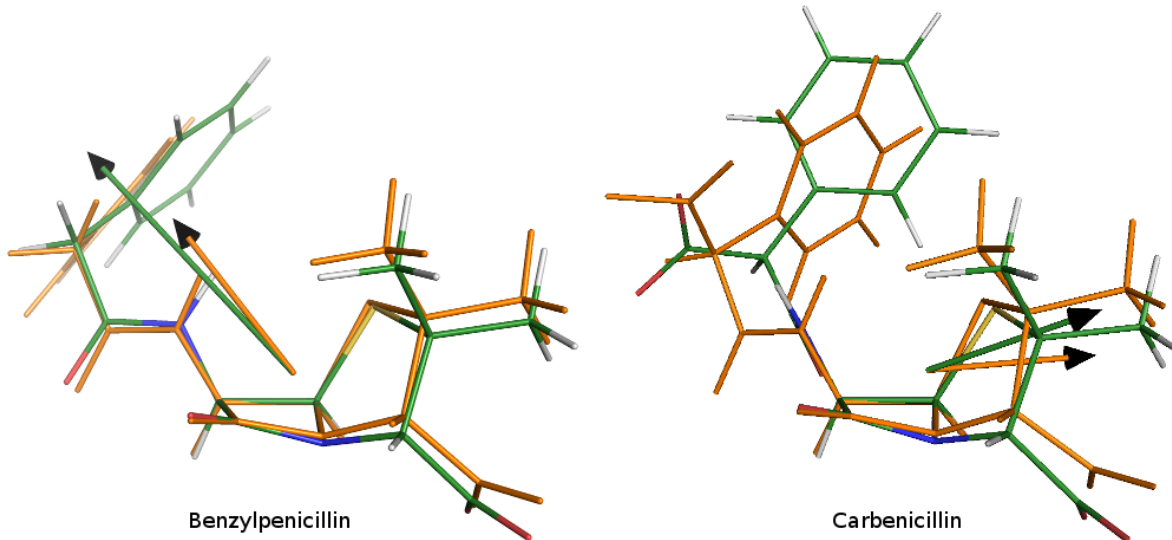

Figure S7: QM and MM Geometry and dipole comparison for benzylpenicillin and carbenicillin. QM-optimized structure in orange. MM-optimized structure is CPK-colored, with carbon in green. Arrows show dipole moment orientation (in orange and green for QM and MM, respectively).

Table S12: Angles in final  $\beta$ -lactam compounds

| Angle |    |    | Benzylpenicillin |       |          | Carbenicillin |       |          |
|-------|----|----|------------------|-------|----------|---------------|-------|----------|
|       |    |    | QM               | MM    | $\Delta$ | QM            | MM    | $\Delta$ |
| C1    | N2 | C3 | 94.7             | 90.8  | -3.9     | 93.8          | 90.1  | -3.7     |
| N2    | C3 | C4 | 88.0             | 90.6  | 2.6      | 88.3          | 90.5  | 2.2      |
| C3    | C4 | C1 | 83.7             | 80.5  | -3.2     | 83.9          | 79.9  | -4.0     |
| C4    | C1 | N2 | 91.5             | 93.6  | 2.1      | 91.1          | 93.8  | 2.7      |
| O1    | C1 | N2 | 133.6            | 133.4 | -0.2     | 133.4         | 132.6 | -0.8     |
| O1    | C1 | C4 | 134.9            | 132.9 | -2.0     | 135.4         | 133.7 | -1.7     |
| C5    | N2 | C1 | 130.5            | 128.1 | -2.4     | 130.5         | 127.4 | -3.1     |
| C5    | N2 | C3 | 117.1            | 121.8 | 4.7      | 115.3         | 122.1 | 5.8      |
| S7    | C3 | N2 | 104.4            | 102.9 | -1.5     | 104.3         | 102.7 | -1.6     |
| S7    | C3 | C4 | 117.9            | 121.2 | 3.3      | 115.9         | 122.8 | 6.9      |
| N11   | C4 | C1 | 117.7            | 119.6 | 1.9      | 116.8         | 123.8 | 7.0      |
| N11   | C4 | C3 | 119.5            | 115.5 | -4.0     | 118.5         | 117.6 | -0.9     |

Table S13: Dipoles in final  $\beta$ -lactam compounds

| Dipole<br>Debye | BZP  |       | CBC |      |
|-----------------|------|-------|-----|------|
|                 | QM   | MM    | QM  | MM   |
| X               | -8.4 | -13.0 | 9.6 | 9.2  |
| Y               | 5.2  | 8.4   | 1.4 | -3.4 |
| Z               | 8.6  | 11.8  | 1.4 | 4.8  |
| T               | 13.1 | 19.5  | 9.8 | 11.0 |

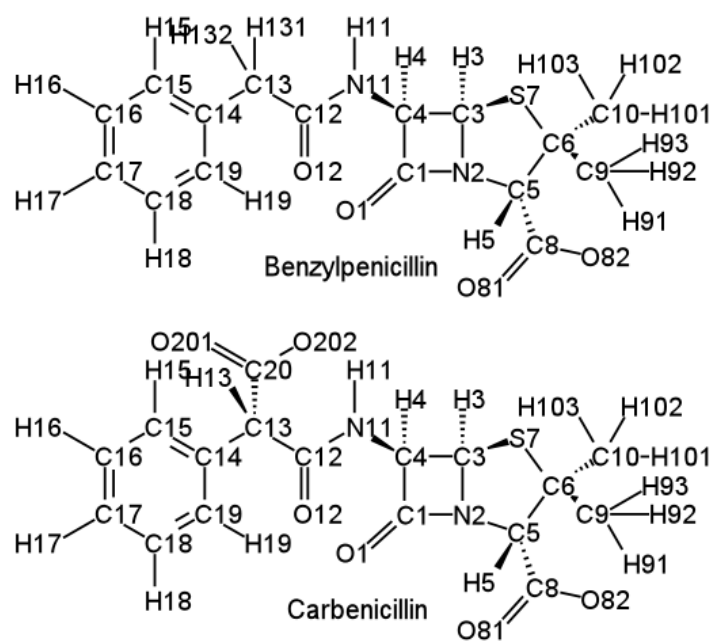

Figure S8: Atom names used in topology and parameter files for  $\beta$ -lactam antibiotics.

The stream file containing topology and parameters is copied here:

```
* CHARMM Generalized Force Field beta-lactam stream file  
*
```

```
read rtf card append
```

```
* CHARMM Generalized Force Field beta-lactams
```

```
*
```

```
36 1
```

```
RESI BZP -1.0  
ATOM C1 CG208 0.475  
ATOM O1 OG2D1 -0.475  
ATOM N2 NG2S4 -0.410  
ATOM C3 CG315 0.195  
ATOM H3 HGA1 0.090  
ATOM C4 CG315 0.235  
ATOM H4 HGA1 0.090  
ATOM C5 CG3C51 0.030  
ATOM H5 HGA1 0.090  
ATOM C6 CG3C50 0.070  
ATOM S7 SG311 -0.230  
ATOM C8 CG203 0.340  
ATOM O81 OG2D2 -0.670  
ATOM O82 OG2D2 -0.670  
ATOM C9 CG331 -0.270  
ATOM H91 HGA3 0.090  
ATOM H92 HGA3 0.090  
ATOM H93 HGA3 0.090  
ATOM C10 CG331 -0.270  
ATOM H101 HGA3 0.090  
ATOM H102 HGA3 0.090  
ATOM H103 HGA3 0.090  
ATOM N11 NG2S1 -0.470  
ATOM H11 HGP1 0.310  
ATOM C12 CG201 0.510  
ATOM O12 OG2D1 -0.510  
ATOM C13 CG321 -0.180  
ATOM H131 HGA2 0.090  
ATOM H132 HGA2 0.090  
ATOM C14 CG2R61 0.000  
ATOM C15 CG2R61 -0.115  
ATOM H15 HGR61 0.115  
ATOM C16 CG2R61 -0.115  
ATOM H16 HGR61 0.115  
ATOM C17 CG2R61 -0.115  
ATOM H17 HGR61 0.115  
ATOM C18 CG2R61 -0.115  
ATOM H18 HGR61 0.115  
ATOM C19 CG2R61 -0.115  
ATOM H19 HGR61 0.115
```

|          |     |      |     |      |     |      |  |  |
|----------|-----|------|-----|------|-----|------|--|--|
| BOND     | C1  | O1   | C1  | N2   | C1  | C4   |  |  |
| BOND     | N2  | C3   | N2  | C5   |     |      |  |  |
| BOND     | C3  | H3   | C3  | C4   | C3  | S7   |  |  |
| BOND     | C4  | H4   | C4  | N11  |     |      |  |  |
| BOND     | C5  | H5   | C5  | C6   | C5  | C8   |  |  |
| BOND     | C6  | S7   | C6  | C9   | C6  | C10  |  |  |
| BOND     | C8  | O81  | C8  | O82  |     |      |  |  |
| BOND     | C9  | H91  | C9  | H92  | C9  | H93  |  |  |
| BOND     | C10 | H101 | C10 | H102 | C10 | H103 |  |  |
| BOND     | N11 | H11  | N11 | C12  |     |      |  |  |
| BOND     | C12 | O12  | C12 | C13  |     |      |  |  |
| BOND     | C13 | H131 | C13 | H132 | C13 | C14  |  |  |
| BOND     | C14 | C15  | C14 | C19  |     |      |  |  |
| BOND     | C15 | H15  | C15 | C16  |     |      |  |  |
| BOND     | C16 | H16  | C16 | C17  |     |      |  |  |
| BOND     | C17 | H17  | C17 | C18  |     |      |  |  |
| BOND     | C18 | H18  | C18 | C19  |     |      |  |  |
| BOND     | C19 | H19  |     |      |     |      |  |  |
| IMPR     | C1  | N2   | C4  | O1   |     |      |  |  |
| IMPR     | N2  | C1   | C3  | C5   |     |      |  |  |
| IMPR     | C8  | C5   | O81 | O82  |     |      |  |  |
| IMPR     | N11 | C4   | C12 | H11  |     |      |  |  |
| IMPR     | C12 | N11  | C13 | O12  |     |      |  |  |
| DONOR    | H11 | N11  |     |      |     |      |  |  |
| ACCEPTOR | O1  | C1   |     |      |     |      |  |  |
| ACCEPTOR | O12 | C12  |     |      |     |      |  |  |

|    |      |     |      |      |        |        |         |        |        |
|----|------|-----|------|------|--------|--------|---------|--------|--------|
| IC | N2   | C4  | *C1  | O1   | 1.3828 | 93.69  | 176.35  | 132.62 | 1.2226 |
| IC | C4   | C1  | N2   | C5   | 1.5486 | 93.69  | 149.24  | 128.45 | 1.4499 |
| IC | C5   | C1  | *N2  | C3   | 1.4499 | 128.45 | -133.13 | 90.99  | 1.4415 |
| IC | C4   | N2  | *C3  | S7   | 1.5678 | 90.64  | 122.09  | 102.90 | 1.8104 |
| IC | C4   | N2  | *C3  | H3   | 1.5678 | 90.64  | -120.21 | 114.47 | 1.0973 |
| IC | C3   | C1  | *C4  | N11  | 1.5678 | 80.55  | -113.92 | 118.48 | 1.4619 |
| IC | C3   | C1  | *C4  | H4   | 1.5678 | 80.55  | 109.07  | 109.34 | 1.0958 |
| IC | C1   | N2  | C5   | C8   | 1.3828 | 128.45 | 156.55  | 109.47 | 1.5200 |
| IC | C8   | N2  | *C5  | C6   | 1.5200 | 109.47 | 118.72  | 103.65 | 1.5561 |
| IC | C6   | N   | *C5  | H5   | 1.5561 | 103.65 | 119.43  | 112.52 | 1.0988 |
| IC | N2   | C5  | C8   | O81  | 1.4499 | 109.47 | 39.51   | 117.97 | 1.2635 |
| IC | O81  | C5  | *C8  | O82  | 1.2635 | 117.97 | 179.38  | 115.31 | 1.2629 |
| IC | S7   | C5  | *C6  | C9   | 1.8894 | 107.10 | 115.59  | 111.14 | 1.5412 |
| IC | S7   | C5  | *C6  | C10  | 1.8894 | 107.10 | -119.45 | 115.69 | 1.5401 |
| IC | C5   | C6  | C9   | H91  | 1.5561 | 111.14 | -50.02  | 110.83 | 1.1091 |
| IC | H91  | C6  | *C9  | H92  | 1.1091 | 110.83 | 119.25  | 109.28 | 1.1103 |
| IC | H91  | C6  | *C9  | H93  | 1.1091 | 110.83 | -121.21 | 110.67 | 1.1091 |
| IC | C5   | C6  | C10  | H101 | 1.5561 | 115.69 | -174.81 | 110.87 | 1.1078 |
| IC | H101 | C6  | *C10 | H102 | 1.1078 | 110.87 | 120.70  | 109.69 | 1.1106 |
| IC | H101 | C6  | *C10 | H103 | 1.1078 | 110.87 | -120.57 | 110.47 | 1.1116 |
| IC | C1   | C4  | N11  | C12  | 1.5486 | 118.48 | -123.92 | 123.18 | 1.3318 |
| IC | C12  | C4  | *N11 | H11  | 1.3318 | 123.18 | 179.00  | 116.07 | 0.9946 |
| IC | C4   | N11 | C12  | C13  | 1.4619 | 123.18 | 178.84  | 117.69 | 1.5018 |
| IC | C13  | N11 | *C12 | O12  | 1.5018 | 117.69 | -178.26 | 121.59 | 1.2230 |

|    |      |     |      |      |        |        |         |        |        |
|----|------|-----|------|------|--------|--------|---------|--------|--------|
| IC | N11  | C12 | C13  | C14  | 1.3318 | 117.69 | 32.50   | 126.90 | 1.5173 |
| IC | C14  | C12 | *C13 | H131 | 1.5173 | 126.90 | 123.38  | 105.57 | 1.1146 |
| IC | H131 | C12 | *C13 | H132 | 1.1146 | 105.57 | 112.32  | 105.23 | 1.1149 |
| IC | C12  | C13 | C14  | C19  | 1.5018 | 126.90 | -169.20 | 117.43 | 1.4060 |
| IC | C19  | C13 | *C14 | C15  | 1.4060 | 117.43 | -178.27 | 123.70 | 1.4095 |
| IC | C13  | C14 | C15  | C16  | 1.5173 | 123.70 | 179.82  | 120.44 | 1.4012 |
| IC | C16  | C14 | *C15 | H15  | 1.4012 | 120.44 | -178.52 | 121.21 | 1.0788 |
| IC | C14  | C15 | C16  | C17  | 1.4095 | 120.44 | -0.56   | 120.08 | 1.3998 |
| IC | C17  | C15 | *C16 | H16  | 1.3998 | 120.08 | -179.84 | 119.80 | 1.0811 |
| IC | C15  | C16 | C17  | C18  | 1.4012 | 120.08 | -0.45   | 119.98 | 1.4001 |
| IC | C18  | C16 | *C17 | H17  | 1.4001 | 119.98 | -179.62 | 119.93 | 1.0804 |
| IC | C19  | C17 | *C18 | H18  | 1.4006 | 119.92 | 179.97  | 120.02 | 1.0803 |
| IC | C18  | C14 | *C19 | H19  | 1.4006 | 120.70 | -179.26 | 119.58 | 1.0800 |

PATCH FIRST NONE LAST NONE

|      |      |        |        |  |
|------|------|--------|--------|--|
| RESI | CBC  | -2.0   |        |  |
| ATOM | C1   | CG208  | 0.475  |  |
| ATOM | O1   | OG2D1  | -0.475 |  |
| ATOM | N2   | NG2S4  | -0.410 |  |
| ATOM | C3   | CG315  | 0.195  |  |
| ATOM | H3   | HGA1   | 0.090  |  |
| ATOM | C4   | CG315  | 0.235  |  |
| ATOM | H4   | HGA1   | 0.090  |  |
| ATOM | C5   | CG3C51 | 0.030  |  |
| ATOM | H5   | HGA1   | 0.090  |  |
| ATOM | C6   | CG3C50 | 0.070  |  |
| ATOM | S7   | SG311  | -0.230 |  |
| ATOM | C8   | CG203  | 0.340  |  |
| ATOM | O81  | OG2D2  | -0.670 |  |
| ATOM | O82  | OG2D2  | -0.670 |  |
| ATOM | C9   | CG331  | -0.270 |  |
| ATOM | H91  | HGA3   | 0.090  |  |
| ATOM | H92  | HGA3   | 0.090  |  |
| ATOM | H93  | HGA3   | 0.090  |  |
| ATOM | C10  | CG331  | -0.270 |  |
| ATOM | H101 | HGA3   | 0.090  |  |
| ATOM | H102 | HGA3   | 0.090  |  |
| ATOM | H103 | HGA3   | 0.090  |  |
| ATOM | N11  | NG2S1  | -0.470 |  |
| ATOM | H11  | HGP1   | 0.310  |  |
| ATOM | C12  | CG201  | 0.510  |  |
| ATOM | O12  | OG2D1  | -0.510 |  |
| ATOM | C13  | CG311  | -0.190 |  |
| ATOM | H13  | HGA1   | 0.090  |  |
| ATOM | C14  | CG2R61 | 0.000  |  |
| ATOM | C15  | CG2R61 | -0.115 |  |
| ATOM | H15  | HGR61  | 0.115  |  |
| ATOM | C16  | CG2R61 | -0.115 |  |
| ATOM | H16  | HGR61  | 0.115  |  |
| ATOM | C17  | CG2R61 | -0.115 |  |
| ATOM | H17  | HGR61  | 0.115  |  |

|      |      |        |        |
|------|------|--------|--------|
| ATOM | C18  | CG2R61 | -0.115 |
| ATOM | H18  | HGR61  | 0.115  |
| ATOM | C19  | CG2R61 | -0.115 |
| ATOM | H19  | HGR61  | 0.115  |
| ATOM | C20  | CG2O3  | 0.620  |
| ATOM | O201 | OG2D2  | -0.760 |
| ATOM | O202 | OG2D2  | -0.760 |

|          |     |      |      |      |     |      |
|----------|-----|------|------|------|-----|------|
| BOND     | C1  | O1   | C1   | N2   | C1  | C4   |
| BOND     | N2  | C3   | N2   | C5   |     |      |
| BOND     | C3  | H3   | C3   | C4   | C3  | S7   |
| BOND     | C4  | H4   | C4   | N11  |     |      |
| BOND     | C5  | H5   | C5   | C6   | C5  | C8   |
| BOND     | C6  | S7   | C6   | C9   | C6  | C10  |
| BOND     | C8  | O81  | C8   | O82  |     |      |
| BOND     | C9  | H91  | C9   | H92  | C9  | H93  |
| BOND     | C10 | H101 | C10  | H102 | C10 | H103 |
| BOND     | N11 | H11  | N11  | C12  |     |      |
| BOND     | C12 | O12  | C12  | C13  |     |      |
| BOND     | C13 | H13  | C13  | C14  | C13 | C20  |
| BOND     | C14 | C15  | C14  | C19  |     |      |
| BOND     | C15 | H15  | C15  | C16  |     |      |
| BOND     | C16 | H16  | C16  | C17  |     |      |
| BOND     | C17 | H17  | C17  | C18  |     |      |
| BOND     | C18 | H18  | C18  | C19  |     |      |
| BOND     | C19 | H19  |      |      |     |      |
| BOND     | C20 | O201 | C20  | O202 |     |      |
| IMPR     | C1  | N2   | C4   | O1   |     |      |
| IMPR     | N2  | C1   | C3   | C5   |     |      |
| IMPR     | C8  | C5   | O81  | O82  |     |      |
| IMPR     | N11 | C4   | C12  | H11  |     |      |
| IMPR     | C12 | N11  | C13  | O12  |     |      |
| IMPR     | C20 | C13  | O201 | O202 |     |      |
| DONOR    | H11 | N11  |      |      |     |      |
| ACCEPTOR | O1  | C1   |      |      |     |      |
| ACCEPTOR | O12 | C12  |      |      |     |      |

|    |     |    |     |     |        |        |         |        |        |
|----|-----|----|-----|-----|--------|--------|---------|--------|--------|
| IC | N2  | C4 | *C1 | O1  | 1.3873 | 93.79  | 178.23  | 133.62 | 1.2233 |
| IC | C4  | C1 | N2  | C5  | 1.5494 | 93.79  | 151.08  | 127.54 | 1.4521 |
| IC | C5  | C1 | *N2 | C3  | 1.4521 | 127.54 | -132.20 | 90.11  | 1.4454 |
| IC | C4  | N2 | *C3 | S7  | 1.5743 | 90.53  | 123.81  | 102.68 | 1.8118 |
| IC | C4  | N2 | *C3 | H3  | 1.5743 | 90.53  | -119.38 | 114.68 | 1.0969 |
| IC | C3  | C1 | *C4 | N11 | 1.5743 | 79.88  | -116.51 | 123.77 | 1.4664 |
| IC | C3  | C1 | *C4 | H4  | 1.5743 | 79.88  | 108.93  | 107.73 | 1.0994 |
| IC | C1  | N2 | C5  | C8  | 1.3873 | 127.54 | 155.85  | 110.86 | 1.5215 |
| IC | C8  | N2 | *C5 | C6  | 1.5215 | 110.86 | 119.89  | 103.74 | 1.5571 |
| IC | C6  | N2 | *C5 | H5  | 1.5571 | 103.74 | 118.42  | 111.84 | 1.0990 |
| IC | N2  | C5 | C8  | O81 | 1.4521 | 110.86 | 38.99   | 118.26 | 1.2628 |
| IC | O81 | C5 | *C8 | O82 | 1.2628 | 118.26 | 179.22  | 115.30 | 1.2651 |
| IC | S7  | C5 | *C6 | C9  | 1.8882 | 107.32 | 115.45  | 111.15 | 1.5411 |
| IC | S7  | C5 | *C6 | C10 | 1.8882 | 107.32 | -119.42 | 115.76 | 1.5405 |
| IC | C5  | C6 | C9  | H91 | 1.5571 | 111.15 | -50.98  | 110.55 | 1.1099 |



|    |     |     |      |      |        |        |         |        |        |
|----|-----|-----|------|------|--------|--------|---------|--------|--------|
| IC | H91 | C6  | *C9  | H92  | 1.1099 | 110.55 | 119.47  | 109.53 | 1.1095 |
| IC | H91 | C6  | *C9  | H93  | 1.1099 | 110.55 | -120.52 | 110.60 | 1.1091 |
| IC | C5  | C6  | C10  | H101 | 1.5571 | 115.76 | -175.73 | 110.69 | 1.1078 |
| IC | H10 | C6  | *C10 | H102 | 1.1078 | 110.69 | 120.75  | 109.70 | 1.1102 |
| IC | H10 | C6  | *C10 | H103 | 1.1078 | 110.69 | -120.38 | 110.29 | 1.1115 |
| IC | C1  | C4  | N11  | C12  | 1.5494 | 123.77 | -179.13 | 120.68 | 1.3383 |
| IC | C12 | C4  | *N11 | H11  | 1.3383 | 120.68 | 175.64  | 120.55 | 0.9995 |
| IC | C4  | N11 | C12  | C13  | 1.4664 | 120.68 | -178.30 | 118.14 | 1.4903 |
| IC | C13 | N11 | *C12 | O12  | 1.4903 | 118.14 | 177.35  | 120.45 | 1.2280 |
| IC | N11 | C12 | C13  | C14  | 1.3383 | 118.14 | 73.23   | 112.86 | 1.5482 |
| IC | C14 | C12 | *C13 | C20  | 1.5482 | 112.86 | -125.80 | 103.04 | 1.5281 |
| IC | C14 | C12 | *C13 | H13  | 1.5482 | 112.86 | 121.17  | 107.77 | 1.1058 |
| IC | C12 | C13 | C14  | C19  | 1.4903 | 112.86 | -166.20 | 118.46 | 1.4108 |
| IC | C19 | C13 | *C14 | C15  | 1.4108 | 118.46 | -173.62 | 124.04 | 1.4168 |
| IC | C13 | C14 | C15  | C16  | 1.5482 | 124.04 | 176.56  | 121.38 | 1.3997 |
| IC | C16 | C14 | *C15 | H15  | 1.3997 | 121.38 | 179.52  | 120.15 | 1.0795 |
| IC | C14 | C15 | C16  | C17  | 1.4168 | 121.38 | -1.37   | 119.99 | 1.3986 |
| IC | C17 | C15 | *C16 | H16  | 1.3986 | 119.99 | 179.86  | 119.58 | 1.0801 |
| IC | C15 | C16 | C17  | C18  | 1.3997 | 119.99 | -0.27   | 119.83 | 1.3988 |
| IC | C18 | C16 | *C17 | H17  | 1.3988 | 119.83 | 179.86  | 120.03 | 1.0793 |
| IC | C19 | C17 | *C18 | H18  | 1.3996 | 119.89 | 179.57  | 120.40 | 1.0793 |
| IC | C18 | C14 | *C19 | H19  | 1.3996 | 121.63 | -177.67 | 118.65 | 1.0808 |
| IC | C12 | C13 | C20  | O201 | 1.4903 | 103.04 | 102.23  | 117.85 | 1.2582 |
| IC | O20 | C13 | *C20 | O202 | 1.2582 | 117.85 | -179.13 | 115.41 | 1.2598 |

PATCH FIRST NONE LAST NONE

end

read param card flex append

\* CHARMM Generalized Force Field beta-lactams

\*

BONDS

|        |        |        |         |
|--------|--------|--------|---------|
| CG208  | OG2D1  | 725.0  | 1.22188 |
| CG208  | NG2S4  | 267.0  | 1.36713 |
| CG208  | CG315  | 297.5  | 1.53754 |
| CG315  | NG2S4  | 298.0  | 1.46504 |
| CG315  | HGA1   | 341.0  | 1.09676 |
| CG315  | CG315  | 270.0  | 1.57285 |
| NG2S4  | CG3C51 | 405.5  | 1.44255 |
| CG315  | SG311  | 283.5  | 1.80608 |
| CG315  | NG2S1  | 342.5  | 1.44688 |
| CG3C50 | SG311  | 162.5  | 1.8387  |
| CG3C50 | CG3C51 | 222.50 | 1.5000  |
| CG3C50 | CG331  | 222.50 | 1.5380  |

ANGLES

|       |       |       |      |         |
|-------|-------|-------|------|---------|
| NG2S4 | CG208 | OG2D1 | 77.0 | 133.609 |
| CG315 | CG208 | OG2D1 | 15.0 | 134.322 |
| CG315 | CG208 | NG2S4 | 67.0 | 92.027  |
| CG208 | NG2S4 | CG315 | 10.0 | 95.724  |

|        |        |        |       |         |       |         |
|--------|--------|--------|-------|---------|-------|---------|
| NG2S4  | CG315  | HGA1   | 45.5  | 112.900 |       |         |
| CG315  | CG315  | NG2S4  | 52.0  | 87.034  |       |         |
| CG315  | CG315  | HGA1   | 37.0  | 113.254 | 22.53 | 2.2445  |
| CG208  | CG315  | CG315  | 10.0  | 84.983  |       |         |
| CG208  | CG315  | HGA1   | 40.0  | 113.556 |       |         |
| CG208  | NG2S4  | CG3C51 | 55.5  | 131.522 |       |         |
| CG315  | NG2S4  | CG3C51 | 139.0 | 131.828 |       |         |
| SG311  | CG315  | NG2S4  | 72.0  | 117.164 |       |         |
| SG311  | CG315  | HGA1   | 31.0  | 107.086 |       |         |
| CG315  | CG315  | SG311  | 89.4  | 117.004 |       |         |
| CG208  | CG315  | NG2S1  | 14.5  | 111.267 |       |         |
| CG315  | CG315  | NG2S1  | 79.2  | 116.893 |       |         |
| NG2S1  | CG315  | HGA1   | 13.0  | 115.059 | 50.00 | 2.15540 |
| NG2S4  | CG3C51 | HGA1   | 48.00 | 112.00  |       |         |
| CG3C50 | CG3C51 | NG2S4  | 70.00 | 110.80  |       |         |
| CG203  | CG3C51 | NG2S4  | 50.00 | 107.00  |       |         |
| CG3C50 | CG3C51 | HGA1   | 34.60 | 110.10  | 22.53 | 2.179   |
| CG203  | CG3C51 | CG3C50 | 52.00 | 108.00  |       |         |
| CG3C51 | CG3C50 | SG311  | 56.5  | 108.74  |       |         |
| CG3C51 | CG3C50 | CG331  | 58.35 | 113.50  | 11.16 | 2.561   |
| CG331  | CG3C50 | SG311  | 56.5  | 108.74  |       |         |
| CG331  | CG3C50 | CG331  | 58.35 | 113.50  | 11.16 | 2.561   |
| CG315  | SG311  | CG3C50 | 93.5  | 100.48  |       |         |
| CG3C50 | CG331  | HGA3   | 33.43 | 110.10  | 22.53 | 2.17900 |
| CG315  | NG2S1  | HGP1   | 35.00 | 117.00  |       |         |
| CG201  | NG2S1  | CG315  | 50.00 | 120.00  |       |         |
| CG201  | CG311  | CG2R61 | 52.00 | 108.00  |       |         |
| CG201  | CG311  | CG203  | 52.00 | 108.00  |       |         |
| CG201  | CG321  | CG2R61 | 52.00 | 108.00  |       |         |

#### DIHEDRALS

|       |       |       |       |        |   |        |
|-------|-------|-------|-------|--------|---|--------|
| HGA1  | CG315 | NG2S4 | CG208 | 0.8000 | 3 | 0.00   |
| CG315 | CG315 | NG2S4 | CG208 | 0.8000 | 3 | 0.00   |
| SG311 | CG315 | NG2S4 | CG208 | 0.8000 | 3 | 0.00   |
| CG208 | CG315 | CG315 | NG2S4 | 0.2000 | 3 | 0.00   |
| CG208 | CG315 | CG315 | HGA1  | 0.2000 | 3 | 0.00   |
| CG208 | CG315 | CG315 | SG311 | 0.2000 | 3 | 0.00   |
| OG2D1 | CG208 | NG2S4 | CG315 | 2.7500 | 2 | 180.00 |
| OG2D1 | CG208 | NG2S4 | CG315 | 0.3000 | 4 | 0.00   |
| OG2D1 | CG208 | CG315 | CG315 | 0.4000 | 1 | 180.00 |
| OG2D1 | CG208 | CG315 | CG315 | 0.6000 | 2 | 0.00   |
| OG2D1 | CG208 | CG315 | HGA1  | 0.4000 | 1 | 0.00   |
| OG2D1 | CG208 | CG315 | HGA1  | 0.6000 | 2 | 0.00   |
| NG2S4 | CG208 | CG315 | CG315 | 0.4000 | 1 | 0.00   |
| NG2S4 | CG208 | CG315 | CG315 | 0.6000 | 2 | 0.00   |
| NG2S4 | CG208 | CG315 | HGA1  | 0.4000 | 1 | 180.00 |
| NG2S4 | CG208 | CG315 | HGA1  | 0.6000 | 2 | 0.00   |
| NG2S4 | CG315 | CG315 | HGA1  | 0.2000 | 3 | 0.00   |
| CG315 | CG208 | NG2S4 | CG315 | 2.7500 | 2 | 180.00 |
| CG315 | CG208 | NG2S4 | CG315 | 0.3000 | 4 | 0.00   |
| HGA1  | CG315 | CG315 | HGA1  | 0.1950 | 3 | 0.00   |
| SG311 | CG315 | CG315 | HGA1  | 0.1950 | 3 | 0.00   |

|        |        |        |        |        |   |        |
|--------|--------|--------|--------|--------|---|--------|
| HGA1   | CG3C51 | NG2S4  | CG208  | 0.8000 | 3 | 0.00   |
| CG3C50 | CG3C51 | NG2S4  | CG208  | 0.8000 | 3 | 0.00   |
| CG203  | CG3C51 | NG2S4  | CG208  | 0.8000 | 3 | 0.00   |
| CG208  | CG315  | NG2S1  | HGP1   | 0.0000 | 1 | 0.00   |
| CG208  | CG315  | NG2S1  | CG201  | 0.2000 | 1 | 180.00 |
| OG2D1  | CG208  | NG2S4  | CG3C51 | 2.7500 | 2 | 180.00 |
| OG2D1  | CG208  | NG2S4  | CG3C51 | 0.3000 | 4 | 0.00   |
| OG2D1  | CG208  | CG315  | NG2S1  | 0.0000 | 1 | 0.00   |
| NG2S4  | CG208  | CG315  | NG2S1  | 0.4000 | 1 | 0.00   |
| NG2S4  | CG315  | CG315  | NG2S1  | 0.2000 | 3 | 0.00   |
| NG2S4  | CG315  | SG311  | CG3C50 | 0.1400 | 3 | 0.00   |
| NG2S4  | CG3C51 | CG3C50 | SG311  | 0.0500 | 3 | 0.00   |
| NG2S4  | CG3C51 | CG3C50 | CG331  | 0.0500 | 3 | 0.00   |
| OG2D2  | CG203  | CG3C51 | NG2S4  | 0.0000 | 6 | 180.00 |
| HGA1   | CG3C51 | NG2S4  | CG315  | 0.1000 | 3 | 0.00   |
| CG3C50 | CG3C51 | NG2S4  | CG315  | 0.1000 | 3 | 0.00   |
| CG203  | CG3C51 | NG2S4  | CG315  | 0.1000 | 3 | 0.00   |
| CG315  | CG315  | NG2S1  | HGP1   | 0.0000 | 1 | 0.00   |
| CG315  | CG315  | NG2S1  | CG201  | 1.8000 | 1 | 0.00   |
| CG3C51 | CG3C50 | SG311  | CG315  | 0.1580 | 3 | 0.00   |
| CG331  | CG3C50 | SG311  | CG315  | 0.2000 | 3 | 0.00   |
| HGA1   | CG315  | NG2S4  | CG3C51 | 0.1000 | 3 | 0.00   |
| NG2S1  | CG315  | CG315  | HGA1   | 0.2000 | 3 | 0.00   |
| HGA1   | CG315  | SG311  | CG3C50 | 0.1950 | 3 | 0.00   |
| CG311  | CG201  | NG2S0  | CG3C51 | 2.7500 | 2 | 180.00 |
| CG315  | CG208  | NG2S4  | CG3C51 | 0.3000 | 4 | 0.00   |
| CG315  | CG315  | NG2S4  | CG3C51 | 0.1000 | 3 | 0.00   |
| CG315  | CG315  | SG311  | CG3C50 | 0.2000 | 3 | 0.00   |
| OG2D1  | CG201  | NG2S1  | CG315  | 2.5000 | 2 | 180.00 |
| CG321  | CG201  | NG2S1  | CG315  | 1.6000 | 1 | 0.00   |
| CG321  | CG201  | NG2S1  | CG315  | 2.5000 | 2 | 180.00 |
| HGA1   | CG315  | NG2S1  | HGP1   | 0.0000 | 1 | 0.00   |
| HGA1   | CG315  | NG2S1  | CG201  | 0.0000 | 1 | 0.00   |
| SG311  | CG315  | NG2S4  | CG3C51 | 0.1000 | 3 | 0.00   |
| CG3C51 | CG3C50 | CG331  | HGA3   | 0.1500 | 3 | 180.00 |
| SG311  | CG3C50 | CG3C51 | HGA1   | 0.0500 | 3 | 0.00   |
| CG331  | CG3C50 | CG3C51 | HGA1   | 0.0500 | 3 | 0.00   |
| OG2D2  | CG203  | CG3C51 | CG3C50 | 0.0500 | 6 | 180.00 |
| SG311  | CG315  | CG315  | NG2S1  | 0.2000 | 3 | 0.00   |
| SG311  | CG3C50 | CG3C51 | CG203  | 0.0500 | 3 | 0.00   |
| SG311  | CG3C50 | CG331  | HGA3   | 0.1600 | 3 | 0.00   |
| CG331  | CG3C50 | CG3C51 | CG203  | 0.1580 | 3 | 0.00   |
| CG331  | CG3C50 | CG331  | HGA3   | 0.1600 | 3 | 0.00   |
| CG311  | CG201  | NG2S1  | CG315  | 1.6000 | 1 | 0.00   |
| CG311  | CG201  | NG2S1  | CG315  | 2.5000 | 2 | 180.00 |
| NG2S1  | CG201  | CG311  | CG2R61 | 0.0000 | 1 | 0.00   |
| NG2S1  | CG201  | CG311  | CG203  | 0.0000 | 1 | 0.00   |
| CG2R61 | CG2R61 | CG311  | CG201  | 0.2300 | 2 | 180.00 |
| OG2D2  | CG203  | CG311  | CG201  | 0.0500 | 6 | 180.00 |
| OG2D1  | CG201  | CG311  | CG2R61 | 1.4000 | 1 | 0.00   |
| OG2D1  | CG201  | CG311  | CG203  | 1.4000 | 1 | 0.00   |
| NG2S1  | CG201  | CG321  | CG2R61 | 0.0000 | 1 | 0.00   |

```
CG2R61 CG2R61 CG321 CG201    0.2300  2  180.00
OG2D1  CG201  CG321  CG2R61    0.0500  6  180.00
```

#### IMPROPERS

```
CG208  X      X      OG2D1  161.5  0    0.00
NG2S4  CG208  CG315  CG3C51   0.0  0    0.00
```

end

return

To use this file, the CGenFF forcefield must be patched to add the new atom types. Here are the relevant lines which must be added to the appropriate sections in the forcefield files:

#### ATOMS

```
MASS  92  CG208  12.01100 ! Carboxyl C in beta-lactam ring
MASS  93  CG315  12.01100 ! Aliphatic C for CH in beta-lactam ring
MASS 126  NG2S4  14.00700 ! N,N-Disubstituted amide N in beta-lactam ring
```

#### NONBONDED

```
NG2S4  0.0  -0.2000  1.8500  0.0  -0.20  1.55
CG208  0.0  -0.1100  2.0000
CG315  0.0  -0.0320  2.0000  0.0  -0.01  1.90
```

## Backbone dynamics

Simulation stability was assessed from global RMSD for main chain heavy atoms, as shown in Figure S9 and discussed in the main text. Example of correlation functions used to compute synthetic  $S^2$  are given in Figure S10. These show that the vast majority of residues display converging functions; the averaging over ten trajectories further improve  $S^2$  estimate, yielding parameters that are in agreement with NMR relaxation results, as discussed in the main text.

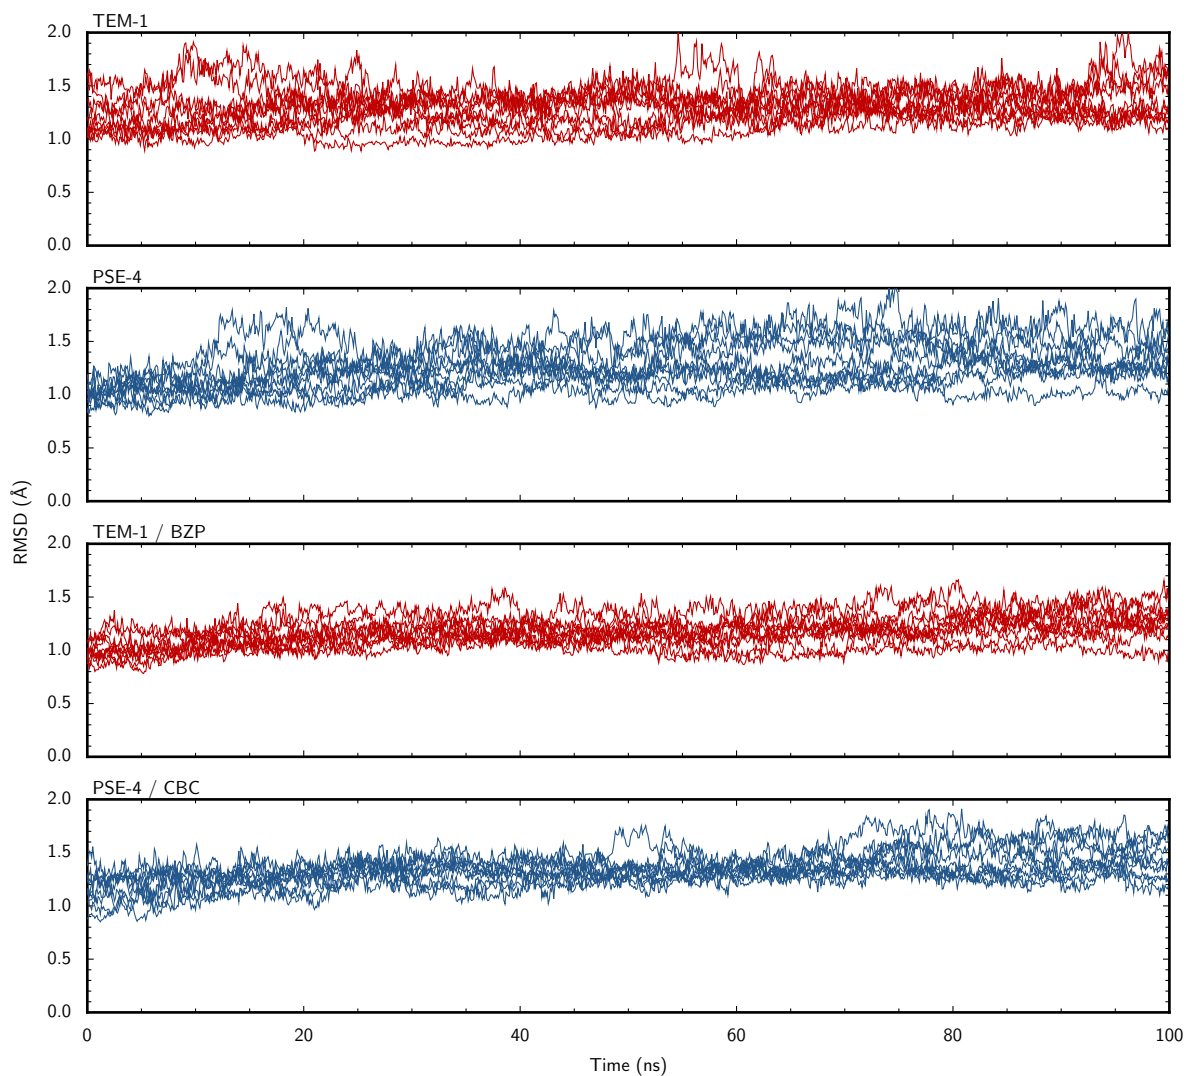

Figure S9: Global RMSD for all simulations. Only main chain heavy atoms were considered. For each of the four systems (TEM-1, PSE-4, TEM-1 / BZP and PSE-4 / CBC), ten 100 ns production trajectories were recorded and are shown together in the respective panels. Data points are 10 ps apart and averaged over that time period (10 values).

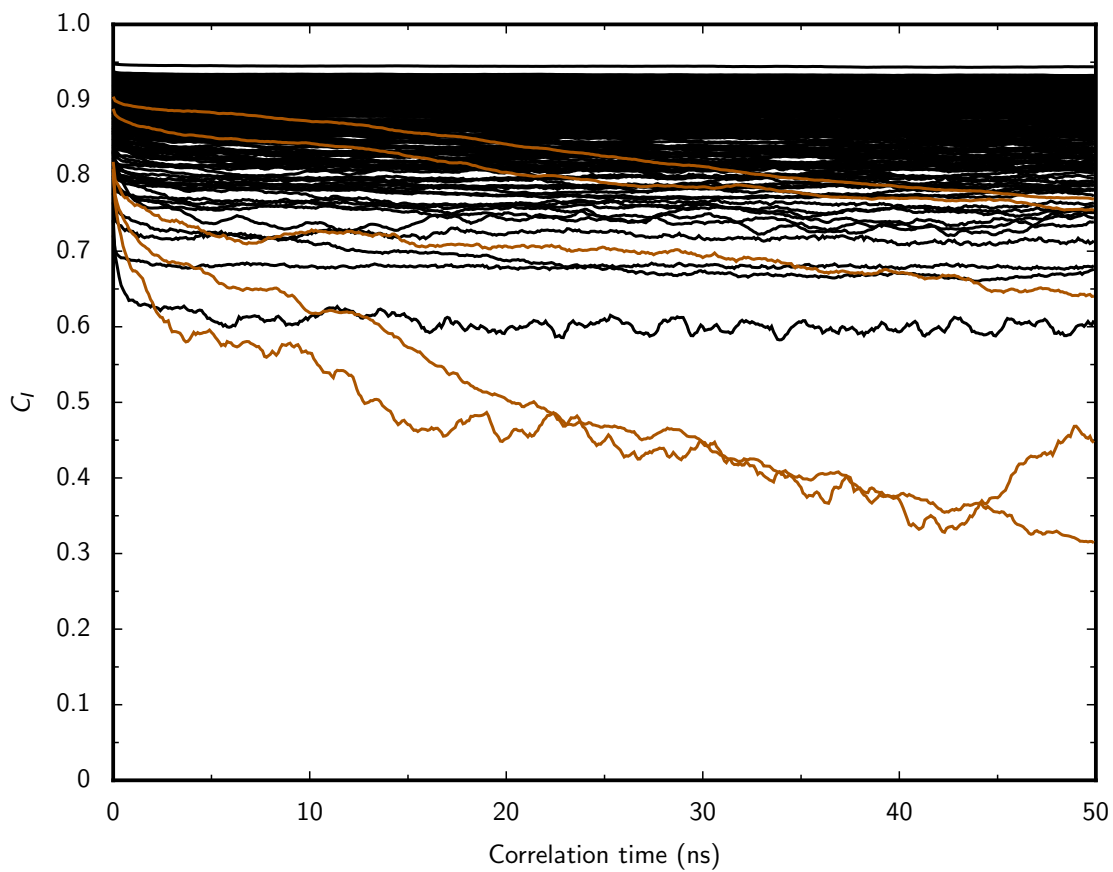

Figure S10: Example  $C_I(t)$  autocorrelation functions for all residues in one free form TEM-1 trajectory. Functions that are unconverged at  $t = 10$  ns are shown in orange. Convergence criteria is  $\Delta C_I < 0.05$  between  $t = 10$  ns and  $t = 50$  ns. There are five unconverged residues: R43, H158, K288, H289 and W290. Similar results are observed for the other trajectories, but unconverged residues vary.

## Essential dynamics movie list

**Movie S1:** PCA for TEM-1 (free form) – Modes 1 to 5

**Movie S2:** PCA for PSE-4 (free form) – Modes 1 to 5

**Movie S3:** PCA for TEM-1 / BZP – Modes 1 to 5

**Movie S4:** PCA for PSE-4 / CBC – Modes 1 to 5

Eigenvectors are displayed consecutively in each movie. System and vector number are shown in upper-left corner. Residues are colored on a scale from blue to red according to their amplitude of motion within the eigenvector; blue means little amplitude; red high amplitude.

## References

- [1] Girija S. Singh.  $\beta$ -lactams in the new millennium. part i: monobactams and carbapenems. *Mini-Reviews in Medicinal Chemistry*, 4(1):69–92, Jan 2004.
- [2] Girija S. Singh.  $\beta$ -lactams in the new millennium. part ii: cepheems, oxacepheems, penams and sulbactam. *Mini-Reviews in Medicinal Chemistry*, 4(1):93–109, Jan 2004.
- [3] K Vanommeslaeghe, E Hatcher, C Acharya, S Kundu, S Zhong, J Shim, E Darian, O Guvench, P Lopes, I Vorobyov, and A D Mackerell. CHARMM general force field: A force field for drug-like molecules compatible with the charmm all-atom additive biological force fields. *J Comput Chem*, July 2009.
- [4] B. R. Brooks, C. L. Brooks, A. D. Mackerell, L. Nilsson, R. J. Petrella, B. Roux, Y. Won, G. Archontis, C. Bartels, S. Boresch, A. Caffisch, L. Caves, Q. Cui, A. R. Dinner, M. Feig, S. Fischer, J. Gao, M. Hodoscek, W. Im, K. Kuczera, T. Lazaridis, J. Ma, V. Ovchinnikov, E. Paci, R. W. Pastor, C. B. Post, J. Z. Pu, M. Schaefer, B. Tidor, R. M. Venable, H. L. Woodcock, X. Wu, W. Yang, D. M. York, and M. Karplus. CHARMM: the biomolecular simulation program. *J Comput Chem*, 30(10):1545–1614, Jul 2009.
- [5] M. J. Frisch, G. W. Trucks, H. B. Schlegel, G. E. Scuseria, M. A. Robb, J. R. Cheeseman, J. A. Montgomery, Jr., T. Vreven, K. N. Kudin, J. C. Burant, J. M. Millam, S. S. Iyengar, J. Tomasi, V. Barone, B. Mennucci, M. Cossi, G. Scalmani, N. Rega, G. A. Petersson, H. Nakatsuji, M. Hada, M. Ehara, K. Toyota, R. Fukuda, J. Hasegawa, M. Ishida, T. Nakajima, Y. Honda, O. Kitao, H. Nakai, M. Klene, X. Li, J. E. Knox, H. P. Hratchian, J. B. Cross, V. Bakken, C. Adamo, J. Jaramillo, R. Gomperts, R. E. Stratmann, O. Yazyev, A. J. Austin, R. Cammi, C. Pomelli, J. W. Ochterski, P. Y. Ayala, K. Morokuma, G. A. Voth, P. Salvador, J. J. Dannenberg, V. G. Zakrzewski, S. Dapprich, A. D. Daniels, M. C. Strain, O. Farkas, D. K. Malick, A. D. Rabuck, K. Raghavachari, J. B. Foresman, J. V. Ortiz, Q. Cui, A. G. Baboul, S. Clifford, J. Cioslowski, B. B. Stefanov, G. Liu, A. Liashenko, P. Piskorz, I. Komaromi, R. L. Martin, D. J. Fox, T. Keith, M. A. Al-Laham, C. Y. Peng, A. Nanayakkara, M. Challacombe, P. M. W. Gill, B. Johnson, W. Chen, M. W. Wong, C. Gonzalez, and J. A. Pople. *Gaussian 03*. Gaussian inc., Wallingford, CT, 2003.
- [6] Olgun Guvench and Alexander D MacKerell. Automated conformational energy fitting for force-field development. *J Mol Model*, 14(8):667–79, August 2008.
